# Supplementary material for: Molecularly Imprinted Silk Fibroin Nanoparticles
Source: PubMed Central journal article supplement (PMC8289228; doi:10.1021/acsami.1c05405), 2021-06-30
Supplement: am1c05405_si_001.pdf [file am1c05405_si_001.pdf]

# Supporting Information

## Molecularly imprinted silk fibroin nanoparticles.

*Alessandra Maria Bossi<sup>1\*</sup>, Alessio Bucciarelli<sup>2</sup>, Devid Maniglio<sup>3\*\*</sup>*

1. University of Verona, Department of Biotechnology, Strada Le Grazie 15, 37134 Verona,  
Italy.

2. National Council of Research, CNR-Nanotec, Campus Ecotekne - Università del Salento  
via Monteroni - 73100 Lecce, Italy

3. University of Trento, Department of Industrial Engineering, BIOTech Research Center, Via  
delle Regole 101, Mattarello, 38123 Trento, Italy.

### **Corresponding Authors**

\* Alessandra Maria Bossi, email: [alessandramaria.bossi@univr.it](mailto:alessandramaria.bossi@univr.it)

\*\* Devid Maniglio, email: [devid.maniglio@unitn.it](mailto:devid.maniglio@unitn.it)

- 1. Dynamic light scattering of non-methacrylated silk fibroin nanoparticles.**  
**Preliminary experimental evidences over the formation of SF-NPs.**
- 2. Surface Response Method**
- 3. Scanning electron microscopy images**
- 4. Static light scattering for the estimation of molecular weight**
- 5. Zeta potential**
- 6. Template removal**
- 7. Binding of template to MIP SF-NPs**
- 8. Isothermal titration nanocalorimetry**
- 9. Cell toxicity**
- 10. Functional silk fibers decorated with MIP SF-NPs**

## 1. Dynamic light scattering of non-methacrylated silk fibroin nanoparticles. Preliminary experimental evidences over the formation of SF-NPs.

**Figure S1.1** SF-NPs prepared from SF-MA 0.3%. Each measure represents the average of three technical replicas. Red: freshly diluted (Zave=69 nm; PDI 0.329). Green after 4 hours (Zave=65; PDI 0.351)

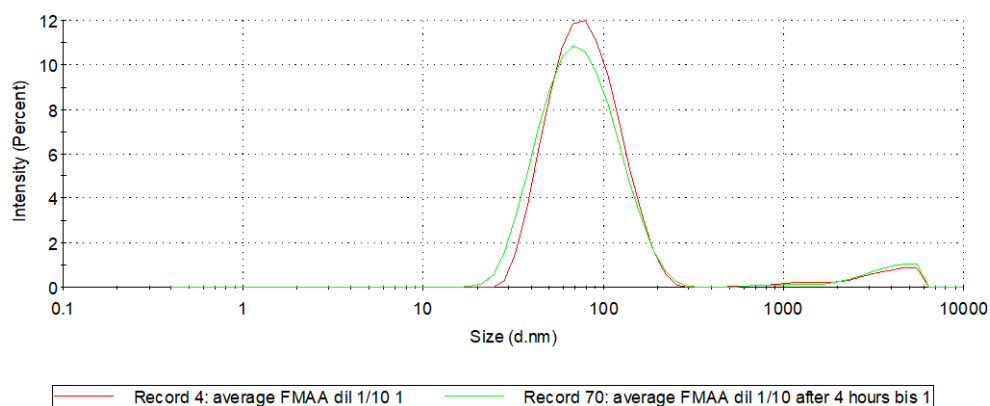

**Figure S1.2** SF-NPs prepared from SF-MA 0.03%. Each measure represents the average of three technical replicas. Red: freshly diluted (Zave=63 nm; PDI 0.318). Green after 4 hours (Zave=120; PDI 0.56).

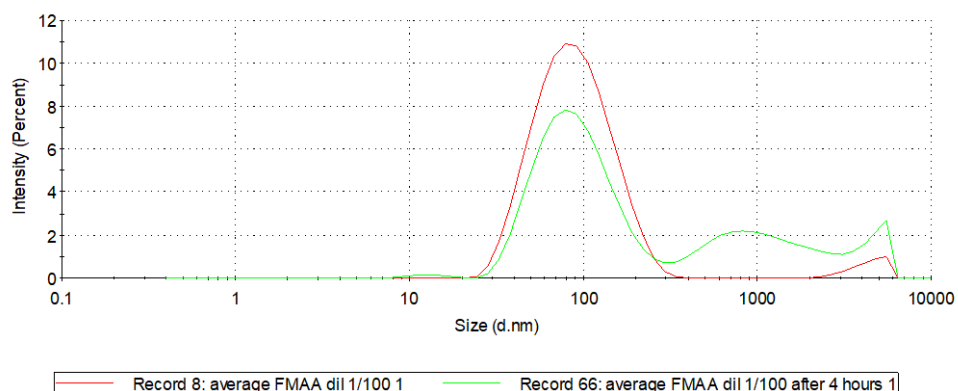

**Figure S1.3** SF-NPs prepared from SF-MA 0.3%. Each measure represents the average of three technical replicas. Red: non-polymerized ( $Z_{ave}=65$  nm). Blue: polymerized ( $Z_{ave} = 79$  nm). Green: polymerized; stored overnight ( $Z_{ave} = 81$  nm).

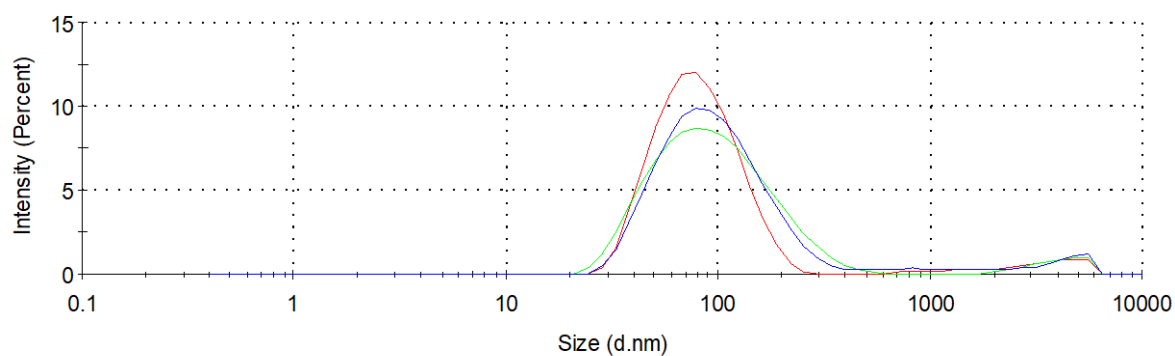

**Figure S1.4** SF-NPs prepared from SF-MA 0.03%. Each measure represents the average of three technical replicas. Red: non-polymerized ( $Z_{ave} = 73$  nm). Blue: polymerized ( $Z_{ave} = 58$  nm). Green: polymerized; stored overnight ( $Z_{ave} = 55$  nm).

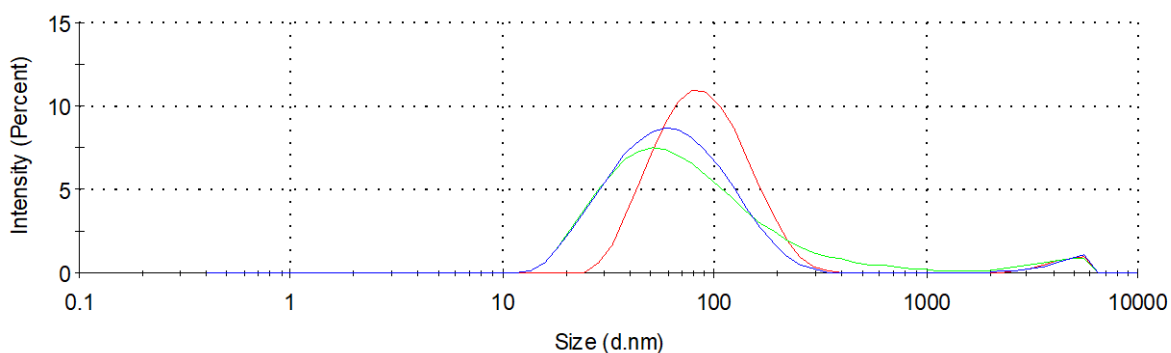

## 2. Response surface method

**Table S2.1:** Table reporting the values of the studied parameters and the corresponding mean value of the nanoparticle diameter and its standard deviation.

| <b>A</b><br><b>pH</b> | <b>B</b><br><b>% LAP</b> | <b>C</b><br><b>%</b> | <b>diameter</b><br><b>nm</b> | <b>PDI</b> |
|-----------------------|--------------------------|----------------------|------------------------------|------------|
| 3.5                   | 0.04                     | 0.03                 | 60.6                         | 0.27       |
| 3.5                   | 0.04                     | 0.03                 | 60.9                         | 0.27       |
| 3.5                   | 0.04                     | 0.03                 | 60.9                         | 0.29       |
| 3.5                   | 0.04                     | 0.3                  | 99.3                         | 0.28       |
| 3.5                   | 0.04                     | 0.3                  | 99.8                         | 0.26       |
| 3.5                   | 0.04                     | 0.3                  | 99.3                         | 0.25       |
| 5                     | 0.04                     | 0.03                 | 59.1                         | 0.27       |
| 5                     | 0.04                     | 0.03                 | 58.7                         | 0.27       |
| 5                     | 0.04                     | 0.03                 | 62.4                         | 0.27       |
| 5                     | 0.04                     | 0.3                  | 97.5                         | 0.42       |
| 5                     | 0.04                     | 0.3                  | 98.3                         | 0.37       |
| 5                     | 0.04                     | 0.3                  | 98.3                         | 0.41       |
| 7.4                   | 0.04                     | 0.03                 | 69.6                         | 0.22       |
| 7.4                   | 0.04                     | 0.03                 | 68                           | 0.22       |
| 7.4                   | 0.04                     | 0.03                 | 70.4                         | 0.22       |
| 7.4                   | 0.04                     | 0.3                  | 115                          | 0.87       |
| 7.4                   | 0.04                     | 0.3                  | 118.1                        | 0.71       |
| 7.4                   | 0.04                     | 0.3                  | 114                          | 0.7        |
| 9.8                   | 0.04                     | 0.03                 | 63.5                         | 0.23       |
| 9.8                   | 0.04                     | 0.03                 | 62.7                         | 0.24       |
| 9.8                   | 0.04                     | 0.03                 | 58.7                         | 0.22       |
| 9.8                   | 0.04                     | 0.3                  | 113.3                        | 0.92       |
| 9.8                   | 0.04                     | 0.3                  | 96.4                         | 0.86       |
| 9.8                   | 0.04                     | 0.3                  | 98.2                         | 0.89       |
| 3.5                   | 0.2                      | 0.03                 | 51.3                         | 0.23       |
| 3.5                   | 0.2                      | 0.03                 | 51.2                         | 0.23       |
| 3.5                   | 0.2                      | 0.03                 | 57.7                         | 0.23       |
| 3.5                   | 0.2                      | 0.3                  | 112.2                        | 0.23       |
| 3.5                   | 0.2                      | 0.3                  | 90.9                         | 0.22       |
| 3.5                   | 0.2                      | 0.3                  | 107                          | 0.23       |
| 5                     | 0.2                      | 0.03                 | 58.7                         | 0.18       |
| 5                     | 0.2                      | 0.03                 | 58.8                         | 0.19       |
| 5                     | 0.2                      | 0.03                 | 57.7                         | 0.18       |
| 5                     | 0.2                      | 0.3                  | 100.9                        | 0.24       |
| 5                     | 0.2                      | 0.3                  | 103                          | 0.25       |
| 5                     | 0.2                      | 0.3                  | 103                          | 0.25       |
| 7.4                   | 0.2                      | 0.03                 | 52.3                         | 0.22       |
| 7.4                   | 0.2                      | 0.03                 | 52.3                         | 0.13       |
| 7.4                   | 0.2                      | 0.03                 | 52                           | 0.13       |
| 7.4                   | 0.2                      | 0.3                  | 84                           | 0.28       |
| 7.4                   | 0.2                      | 0.3                  | 88                           | 0.25       |
| 7.4                   | 0.2                      | 0.3                  | 89.7                         | 0.28       |
| 9.8                   | 0.2                      | 0.03                 | 60.9                         | 0.29       |
| 9.8                   | 0.2                      | 0.03                 | 60.6                         | 0.16       |
| 9.8                   | 0.2                      | 0.03                 | 60.8                         | 0.16       |
| 9.8                   | 0.2                      | 0.3                  | 90.9                         | 0.29       |
| 9.8                   | 0.2                      | 0.3                  | 91.2                         | 0.29       |
| 9.8                   | 0.2                      | 0.3                  | 91.4                         | 0.29       |

Using the DFBETAS test the highlighted points in **Table S2.1** resulted to be possible outlier. However, as further discussed below, even with the presence of outliers both the regressive models well fit to the data points. To optimize even further the model this 3 point should be repeated.

**Table S2.1:** Scatter plot matrix with the corresponding Pearson's r indices. More the index is close to 1 more the two considered variables are correlated. An index higher than 0.3 is considered as sign of a significative correlation. The ellipsoid indicates the 95% CI.

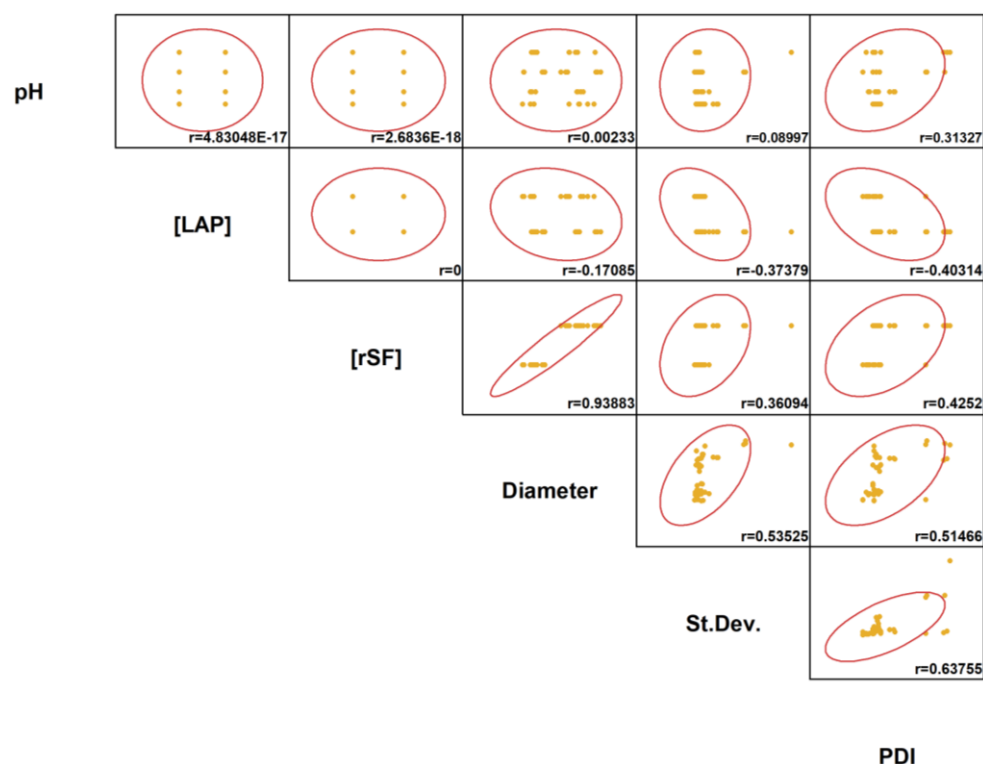

As pre-analysis a scatter plot has been computed, the Pearson's index indicates which factors has the higher impact on the considered property. The diameter results to be strongly dependent on the fibroin concentration. The standard deviation is slightly dependent on both the fibroin and the photoinitiator concentration. The PDI is moderately dependent on the fibroin and photoinitiator concentration and slightly dependent on the pH. It is possible, in addition, to state that a higher diameter implies a higher standard deviation and a higher PDI (in fact both the r indexes are positive and higher than 0.3). Since this method does not provide any information on the dependence of the properties on the mixed factors (like  $pH \cdot [LAP]$ ), to obtain this kind of information the further data analysis has been performed. The predictive models for the diameter and for the polydispersity index are shown in the **Figure 1A** as contour plots.

**Table S2.2:** ANOVA table for the predictive model of the nanoparticle diameter. The significance level is assigned as follow:  $p \leq 0.1$  (.),  $p \leq 0.05$  (\*),  $p \leq 0.01$  (\*\*),  $p \leq 0.001$  (\*\*\*)).

| Source           | Sum of Squares | df | Mean Square | F-value | p-value                |
|------------------|----------------|----|-------------|---------|------------------------|
| <b>Model</b>     | 0.0116         | 11 | 0.0011      | 194.27  | < 0.0001 significant   |
| A-pH             | 4.737E-09      | 1  | 4.737E-09   | 0.0009  | 0.9766 ***             |
| B-LAP conc.      | 0.0005         | 1  | 0.0005      | 94.83   | < 0.0001 ***           |
| C-Fibroin conc.  | 0.0103         | 1  | 0.0103      | 1895.01 | < 0.0001 ***           |
| AB               | 0.0003         | 1  | 0.0003      | 61.45   | < 0.0001 ***           |
| AC               | 0.0001         | 1  | 0.0001      | 13.24   | 0.0009 ***             |
| BC               | 0.0000         | 1  | 0.0000      | 4.60    | 0.0388 *               |
| A <sup>2</sup>   | 5.835E-06      | 1  | 5.835E-06   | 1.08    | 0.3064                 |
| ABC              | 0.0001         | 1  | 0.0001      | 14.29   | 0.0006 ***             |
| A <sup>2</sup> B | 0.0001         | 1  | 0.0001      | 23.80   | < 0.0001 ***           |
| A <sup>3</sup>   | 6.096E-07      | 1  | 6.096E-07   | 0.1125  | 0.7393                 |
| A <sup>3</sup> B | 0.0003         | 1  | 0.0003      | 54.14   | < 0.0001 ***           |
| <b>Residual</b>  | 0.0002         | 36 | 5.419E-06   |         |                        |
| Lack of Fit      | 0.0000         | 4  | 4.425E-06   | 0.7982  | 0.5353 not significant |
| Pure Error       | 0.0002         | 32 | 5.544E-06   |         |                        |
| <b>Cor Total</b> | 0.0118         | 47 |             |         |                        |

The ANOVA test of the diameter predictive model is shown in **Table S2.2**. The **Model F-value** of 194.27 implies that it is significant (there is only a 0.01% chance that an F-value this large could occur due to noise), **P-values** less than 0.0500 indicate model terms are significant. In this case A, C, AB, BC, A<sup>2</sup>, A<sup>2</sup>B, A<sup>2</sup>C, A<sup>3</sup>, A<sup>3</sup>B are significant model terms, the other terms were added to maintain the model hierarchy. The **Lack of Fit F-value** of 0.80 implies the Lack of Fit is not significant relative to the pure error (there is a 53% chance that a Lack of Fit F-value this large could occur due to noise). The model results to well fit the data in fact, as can be clearly seen from the predicted versus actual graph in **Figure S2.1**, the points are close to the line. All the coefficients of the predictive equations including the 95% CI are reported in **Table S2.3**.

**Figure S2.1:** Predicted versus Actual graph for the nanoparticle diameter model. The model well fits the collected data, in fact, the points relative to the data are close to the line, that represent a perfect fitting.

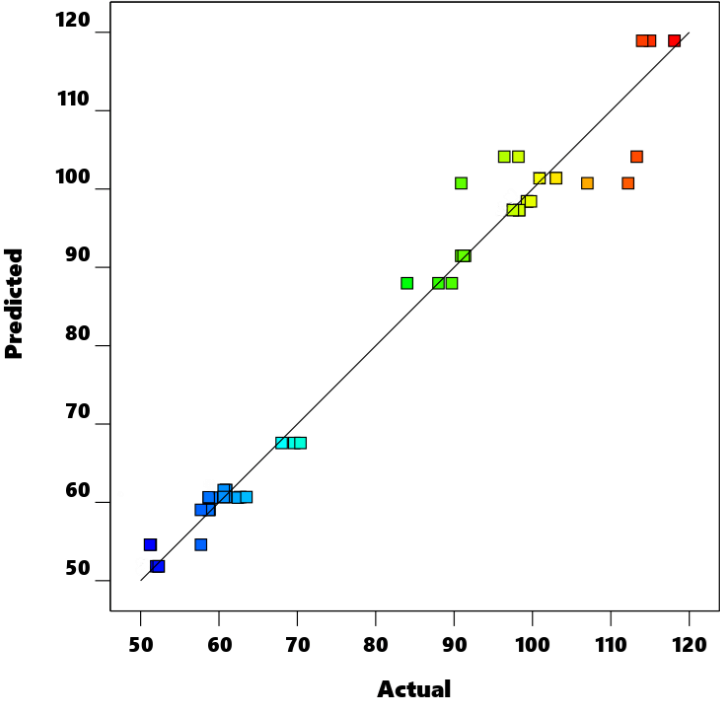



**Table S.2.3:** Estimation of the model and the 95% CI coefficients of the nanoparticle diameter. The equations are in the coded form (with all the factors varying between -1 and 1).

| <b>Factor</b>    | <b>Coefficient Estimate</b> | <b>df</b> | <b>Standard Error</b> | <b>95% CI Low</b> | <b>95% CI High</b> |
|------------------|-----------------------------|-----------|-----------------------|-------------------|--------------------|
| Intercept        | 0.1146                      | 1         | 0.0006                | 0.1135            | 0.1158             |
| A-pH             | -0.0000                     | 1         | 0.0016                | -0.0032           | 0.0031             |
| B-LAP conc.      | 0.0056                      | 1         | 0.0006                | 0.0044            | 0.0068             |
| C-Fibroin conc.  | -0.0147                     | 1         | 0.0003                | -0.0154           | -0.0140            |
| AB               | 0.0122                      | 1         | 0.0016                | 0.0090            | 0.0153             |
| AC               | 0.0016                      | 1         | 0.0004                | 0.0007            | 0.0025             |
| BC               | -0.0007                     | 1         | 0.0003                | -0.0014           | -0.0000            |
| A <sup>2</sup>   | 0.0008                      | 1         | 0.0008                | -0.0008           | 0.0024             |
| ABC              | 0.0017                      | 1         | 0.0004                | 0.0008            | 0.0026             |
| A <sup>2</sup> B | -0.0039                     | 1         | 0.0008                | -0.0055           | -0.0023            |
| A <sup>3</sup>   | -0.0006                     | 1         | 0.0017                | -0.0039           | 0.0028             |
| A <sup>3</sup> B | -0.0122                     | 1         | 0.0017                | -0.0156           | -0.0089            |

**Table S2.4:** ANOVA table for the predictive model of the nanoparticle polydispersity index. The significance level is assigned as follow:  $p \leq 0.1$  (.),  $p \leq 0.05$  (\*),  $p \leq 0.01$  (\*\*),  $p \leq 0.001$  (\*\*\*).

| <b>Source</b>    | <b>Sum of Squares</b> | <b>df</b> | <b>Mean Square</b> | <b>F-value</b> | <b>p-value</b>         |
|------------------|-----------------------|-----------|--------------------|----------------|------------------------|
| <b>Model</b>     | 1.02                  | 10        | 0.1020             | 106.09         | < 0.0001 significant   |
| A-pH             | 0.0766                | 1         | 0.0766             | 79.73          | < 0.0001 ***           |
| B-LAP conc.      | 0.1433                | 1         | 0.1433             | 149.11         | < 0.0001 ***           |
| C-Fibroin conc.  | 0.1891                | 1         | 0.1891             | 196.80         | < 0.0001 ***           |
| AB               | 0.0585                | 1         | 0.0585             | 60.84          | < 0.0001 ***           |
| AC               | 0.1577                | 1         | 0.1577             | 164.13         | < 0.0001 ***           |
| BC               | 0.1028                | 1         | 0.1028             | 106.93         | < 0.0001 ***           |
| A <sup>2</sup>   | 3.774E-06             | 1         | 3.774E-06          | 0.0039         | 0.9504                 |
| ABC              | 0.0726                | 1         | 0.0726             | 75.58          | < 0.0001 ***           |
| A <sup>2</sup> B | 0.0070                | 1         | 0.0070             | 7.28           | 0.0105 *               |
| A <sup>2</sup> C | 0.0144                | 1         | 0.0144             | 14.94          | 0.0004 ***             |
| <b>Residual</b>  | 0.0356                | 37        | 0.0010             |                |                        |
| Lack of Fit      | 0.0060                | 5         | 0.0012             | 1.31           | 0.2851 not significant |
| Pure Error       | 0.0295                | 32        | 0.0009             |                |                        |
| <b>Cor Total</b> | 1.06                  | 47        |                    |                |                        |

The ANOVA test of the PDI model is shown in **Table S2.5**. The **Model F-value** of 106.09 implies the model is significant (there is only a 0.01% chance that an F-value this large could occur due to noise). **P-values** less than 0.0500 indicate model terms are significant. In this case A, B, C, AB, AC, BC, ABC, A<sup>2</sup>B, A<sup>2</sup>C are significant model terms, the other terms were added to maintain the model hierarchy. Values greater than 0.1000 indicate the model terms are not significant. The **Lack of Fit F-value** of 0.28 implies the Lack of Fit is not significant relative to the pure error (there is a 28.29% chance that a Lack of Fit F-value this large could occur due to noise). The model results to well fit the data in fact, as can be clearly seen from the predicted versus actual graph in **Figure S2.2**, the points are close to the line. All the coefficients of the predictive equations including the 95% CI are reported in **Table S2.6**.

**Figure S2.2:** Predicted versus Actual graph for the standard deviation of the nanoparticle polydispersity index. The model well fits the collected data, in fact, the points relative to the data are close to the line, that represent a perfect fitting.

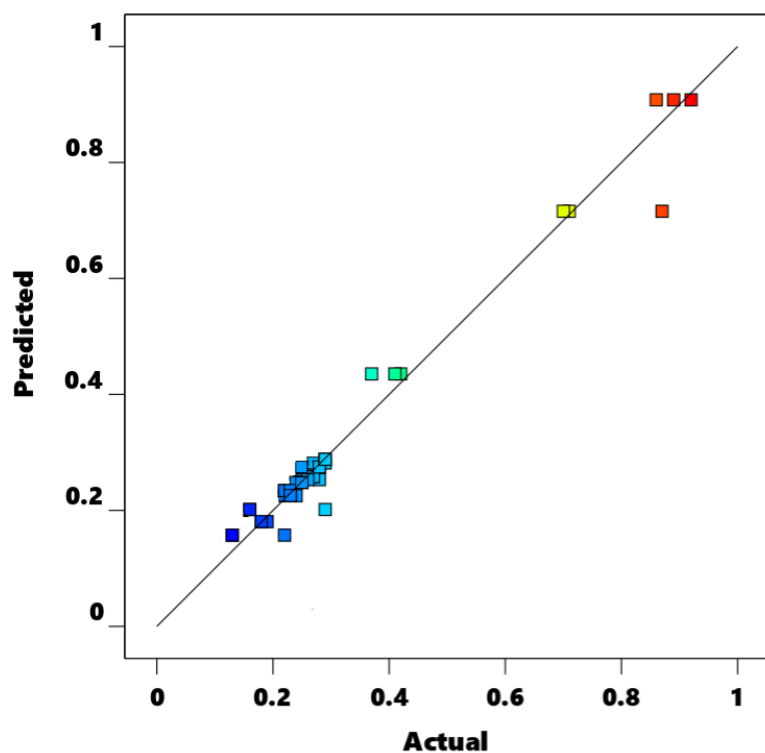

**Table S2.5:** Estimation of the model and the 95% CI coefficients of the nanoparticle polydispersity index. The equations are in the coded form (with all the factors varying between -1 and 1).

| <b>Factor</b>    | <b>Coefficient Estimate</b> | <b>df</b> | <b>Standard Error</b> | <b>95% CI Low</b> | <b>95% CI High</b> |
|------------------|-----------------------------|-----------|-----------------------|-------------------|--------------------|
| Intercept        | 0.5493                      | 1         | 0.0076                | 0.5338            | 0.5647             |
| A-pH             | 0.0526                      | 1         | 0.0059                | 0.0407            | 0.0645             |
| B-LAP conc.      | -0.0931                     | 1         | 0.0076                | -0.1086           | -0.0777            |
| C-Fibroin conc.  | 0.1070                      | 1         | 0.0076                | 0.0915            | 0.1224             |
| AB               | -0.0459                     | 1         | 0.0059                | -0.0579           | -0.0340            |
| AC               | 0.0755                      | 1         | 0.0059                | 0.0635            | 0.0874             |
| BC               | -0.0465                     | 1         | 0.0045                | -0.0556           | -0.0374            |
| A <sup>2</sup>   | 0.0007                      | 1         | 0.0106                | -0.0207           | 0.0220             |
| ABC              | -0.0512                     | 1         | 0.0059                | -0.0631           | -0.0393            |
| A <sup>2</sup> B | 0.0285                      | 1         | 0.0106                | 0.0071            | 0.0498             |
| A <sup>2</sup> C | -0.0408                     | 1         | 0.0106                | -0.0622           | -0.0194            |

### 3. Scanning electron microscopy images

Selected images of the SF-NPs.

**Figure S3.1.** Upper row: SF-NPs prepared from 0.3% w/w SF starting material prepared at pH 7.0 with LAP 0.04% w/v (left) and LAP 0.2% (right).

Lower row: SF-NPs from, prepared from 0.03% w/w SF starting material prepared at pH 7.0 with LAP 0.04% (left) and LAP 0.2% w/v (right).

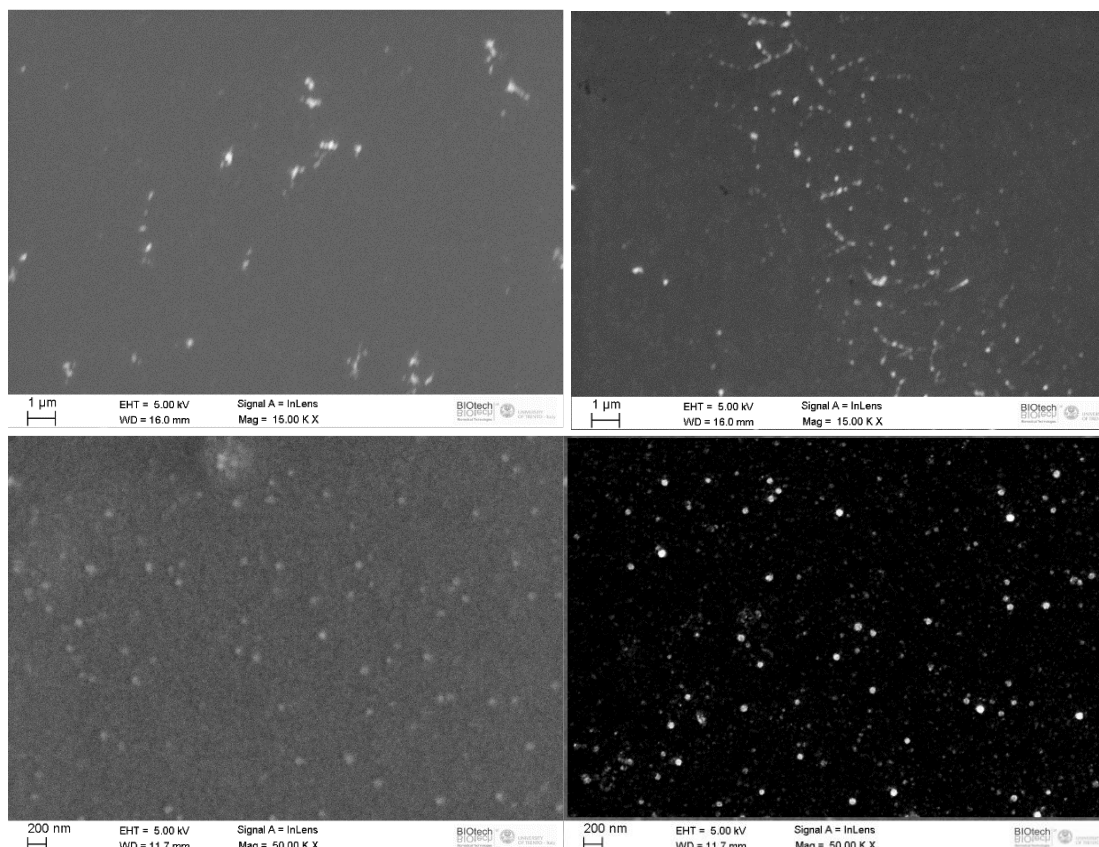

**Figure S3.2.** SEM image of MIP SF-NPs prepared from 0.3% w/w SF starting material.

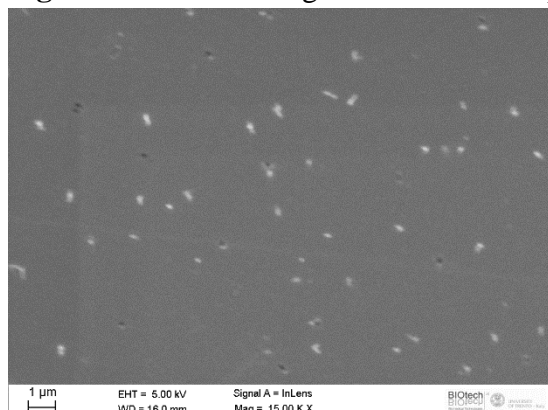

#### 4. Static light scattering for the estimation of molecular weight

**Figure S4.1** SF NPs from 0.3% v/w SF-MA had an estimated  $M_n$  of  $21 \pm 3$  MDa.

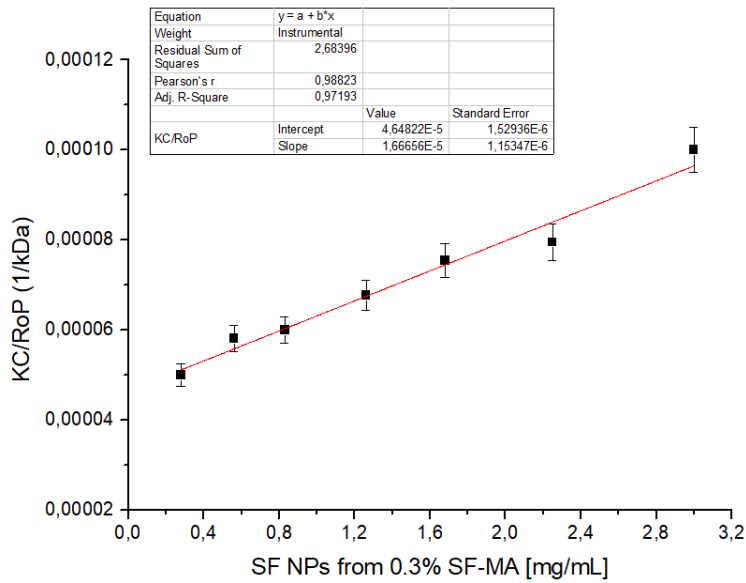

**Figure S4.2** SF NPs from 0.03% v/w SF-MA had an estimated  $M_n$  of  $7.2 \pm 1.3$  MDa.

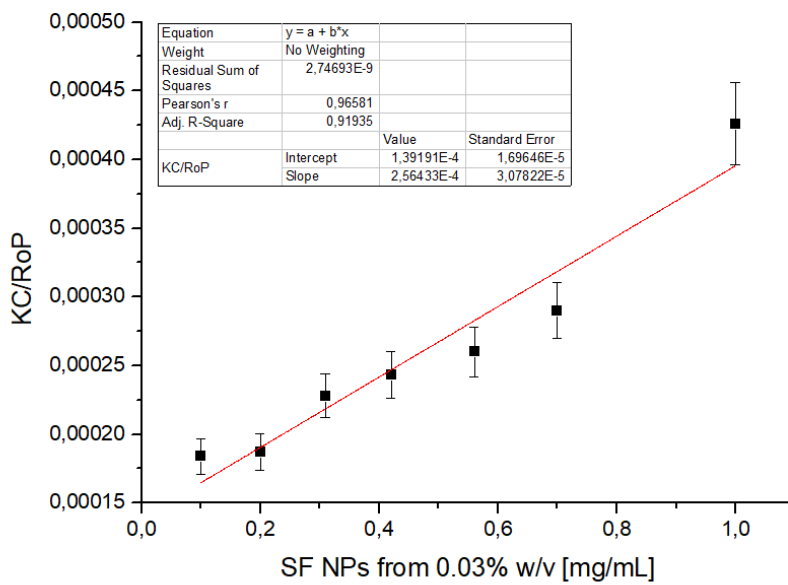

## 5. Zeta potential

Figure S5.1. Zeta potential of SF-NPs.

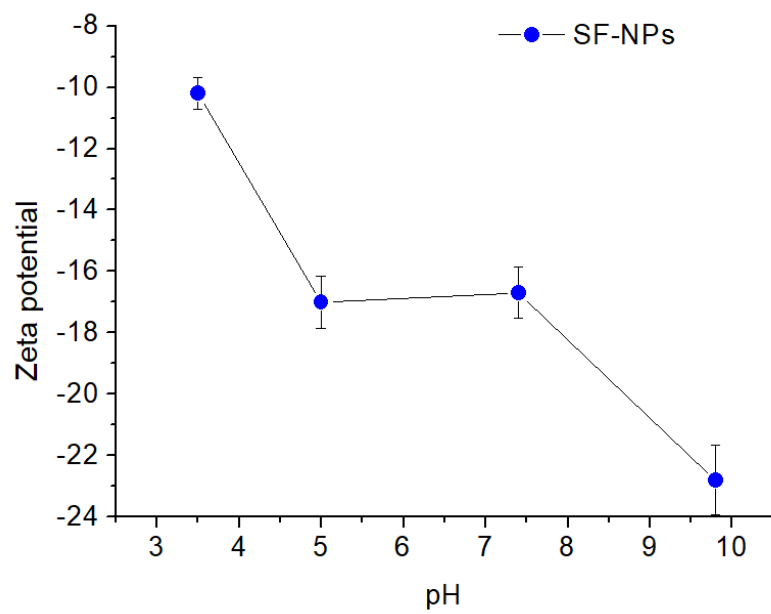

## 6. Template removal

The MIP SF-NPs were synthesized from 0.3% w/v SF-MA in PB pH 7.4 5 mM and using as a template HSA (200  $\mu$ g, V= 4 mL final) LAP 0.2%. Photopolymerized for 10 min.

1 mL of MIP SF-NPs was treated with Tris base 50 mM (100  $\mu$ L for 1mL, pH 10), let stand 1 hour, then divided in 2 x 500  $\mu$ L and microfuged on 100 KDa MWCO (MerckMillipore, Darmstadt, Germany) for 4 times at 10.000 x g (addition of 200  $\mu$ L of PB pH 7.4 Tween 0.05% each time).

Another 1 mL was treated with trypsin (80  $\mu$ g), let stand 2 hours at room temperature, then divided in 2 x 500  $\mu$ L and microfuged on 100 KDa MWCO for 4 times at 10.000 x g (addition of 200  $\mu$ L of PB pH 7.4 Tween 0.05% each time).

Each sample (20  $\mu$ L) was admixed with loading buffer 4X (10  $\mu$ L) and loaded onto precast 4-20% gradient SDS gel (BioRad, Hercules, CA, US). The running conditions were 12 mA/gel 15 min; 24 mA/gel (max 7W) 45 min. Staining: Coomassie G250 (Sigma Aldrich), ethanol, acetic acid. Destaining: ethanol, acetic acid, water.

**Figure S6.1** SDS PAGE of MIP SF-NP after template removal.

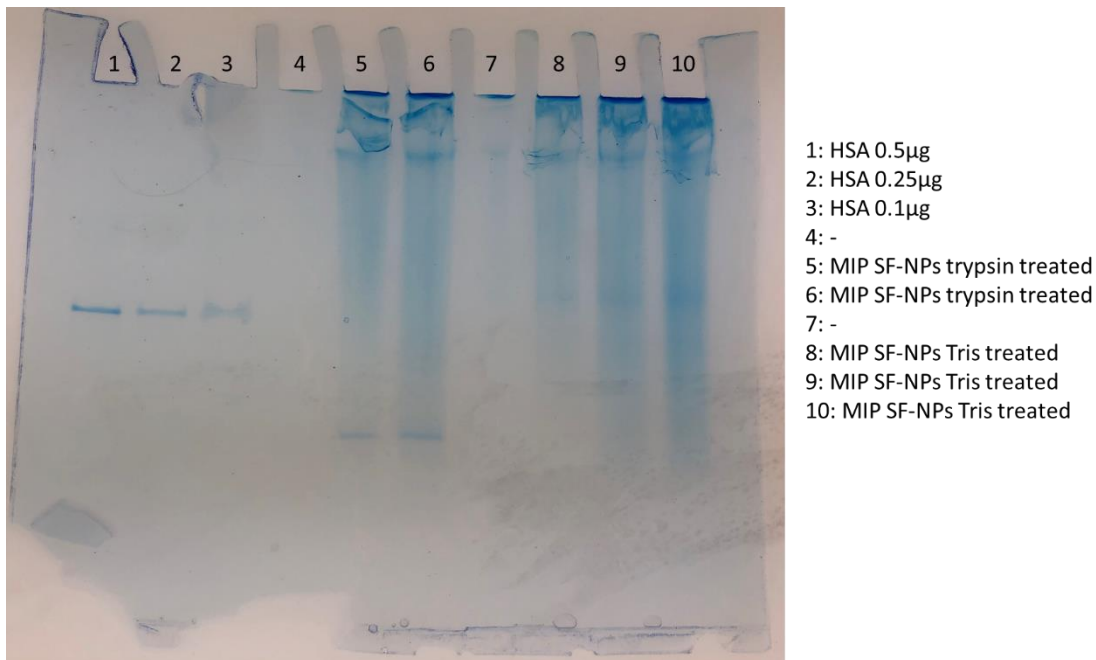

The lack of albumin in the SDS PAGE gel indicated the effectiveness of the washings and the absence of loose template protein in the MIPs. Trypsin was chosen as protocol for albumin removal, because it is demonstrated not to degrade SF<sup>1</sup>. To complete the trypsin removal, treated MIP SF-NPs were dialyzed in 5 mM PB pH 7.4 for 4 hours on 50 kDa m.w.c.o. membranes.



## 7. Binding of template to MIP SF-NPs

### Calibration curve for albumin-FITC

For the calibration curve, fitc-alb was diluted in the range of concentrations from 1 nM to 2  $\mu$ M. Measurements were performed on a Tecan Infinite PRO 200 spectrofluorimeter for microplates (Tecan Lifesciences, Switzerland) in triplicate, using 96 Flat Bottom Black Polystyrene microtiter plates (Nunc™ MicroWell™ 96-Well, Nunclon Delta-Treated, Flat-Bottom Microplate, Thermo Scientific, Germany). The excitation was at the  $\lambda_{exc}=488$  nm and emission was recorded in the range 514-540 nm. Maximum  $\lambda_{em}$  was at 524 nm. Linear regression of datapoints:  $y$  (RFU) = 501537  $x$  (nmol) + 155.32 with  $R^2 = 0.9987$ .

### Increment in fluorescence for the binding of template; reproducibility of batch to batch binding; controls of no binding

Fitc-alb was used to test the binding of MIP-alb SF-NPs. Measurements were performed in triplicate on 96 Flat Bottom Black Polystyrene microtiter plates (Thermo Scientific, Germany). Wells were loaded with 200  $\mu$ g of MIP-alb SF-NPs and incubated with 30 pmol of fitc-alb in PB 50 mM pH 7.4 supplemented with 0.05% Tween-20 ( $V_{tot} = 250$   $\mu$ L;  $V$  in each well 60  $\mu$ L). The excitation was at the  $\lambda_{exc} = 488$  nm and emission was recorded in the range 514-540 nm. Maximum  $\lambda_{em}$  was at 524 nm.

Two batches of independently synthesized MIP-alb NPs were compared. As a control the fluorescence of MIP-alb was tested. As another control, the binding was performed in Trizma base at pH=10 so to unfavour the interaction.

**Figure S7.1.** MIP-alb (yellow) did confirm very limited fluorescence emission over the recorded spectrum. Binding of fitc-alb to MIP-alb SF-NPs showed a fairly reproducible fluorescent signal (blue and black). The fluorescence was limited in the case of using an alkaline pH to unfavor the interaction (red).

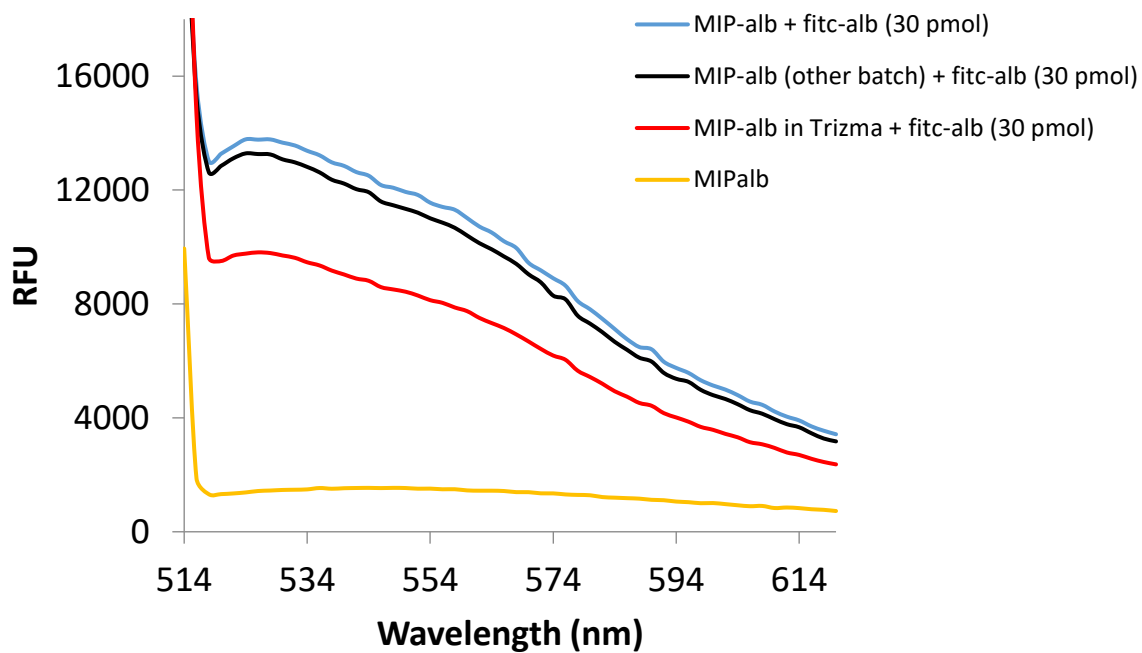

## Binding to MIP or to NIP SF-NPs

**Figure S7.2.** In red: MIP-alb SF-NPs bound to fitc-alb (30 pmol), that results in an enhancement in fluorescence, respect to the fitc-alb (dotted black line). When the digesting enzyme trypsin was added to the fitc-alb bound to MIP-alb, fitc-alb was presumably digested and the emitted fluorescence dropped (light blue). The enhancement of the fluorescence signal was therefore correlated to the binding event. Moreover, the specificity of the binding was supported by the equally low fluorescent signal observed for non imprinted SF-NPs (NIP, purple) in the presence of fitc-alb (30 pmol). As a further control, a MIP SF-NPs prepared using as a template a peptide non-albumin related (green) in the presence of fitc-alb (30 pmol) did show comparable low fluorescence emission to NIP. As control: fluorescence spectra of MIP-alb (yellow).

These results demonstrate the binding of fitc-alb occurred specifically on the MIP-alb and not on the non-imprinted SF-NPs, nor on MIP SF-NPs with non-albumin specific binding sites.

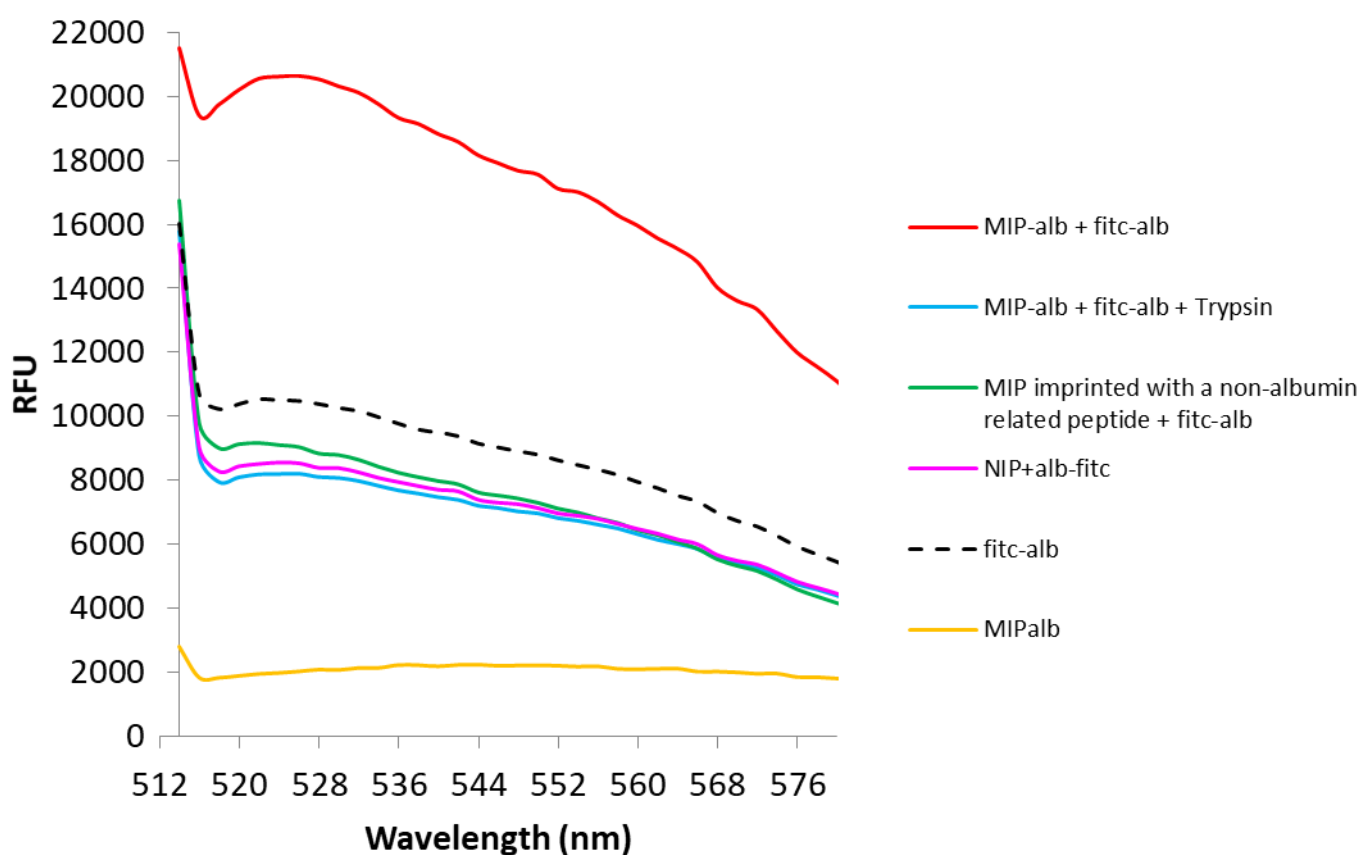

## Competitive binding

**Figure S7.3.** Competitive assay. In red: MIP-alb SF-NPs bound to fitc-alb (30 pmol). When the non fluorescent albumin was added, this resulted in a progressive decrease of the emitted fluorescence (light blue addition of alb 30 pmol; dark blue addition of alb 300 pmol). The decrease resulted more marked for greater quantity of alb competitor, suggesting a displacement of the fitc-alb by alb. As controls fluorescence spectra of MIP-alb (yellow) and fitc-alb 30 pmol (dotted black line).

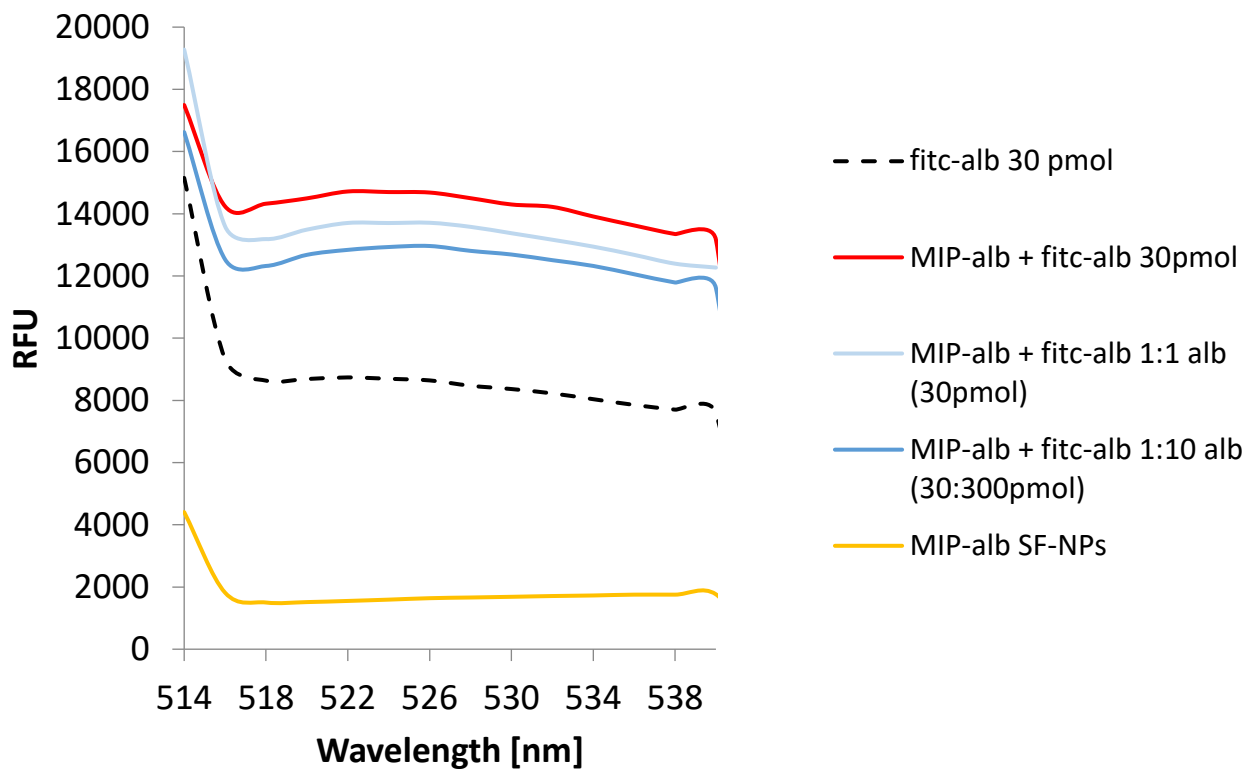

## 8. Isothermal titration nanocalorimetry

**Figure S8.1** Exemplificative raw ITC profiles of MIP-alb SF NPs titrated with the template (HSA, black line) or with non template proteins (cytochrome c, blue line; human transferrin, purple line).

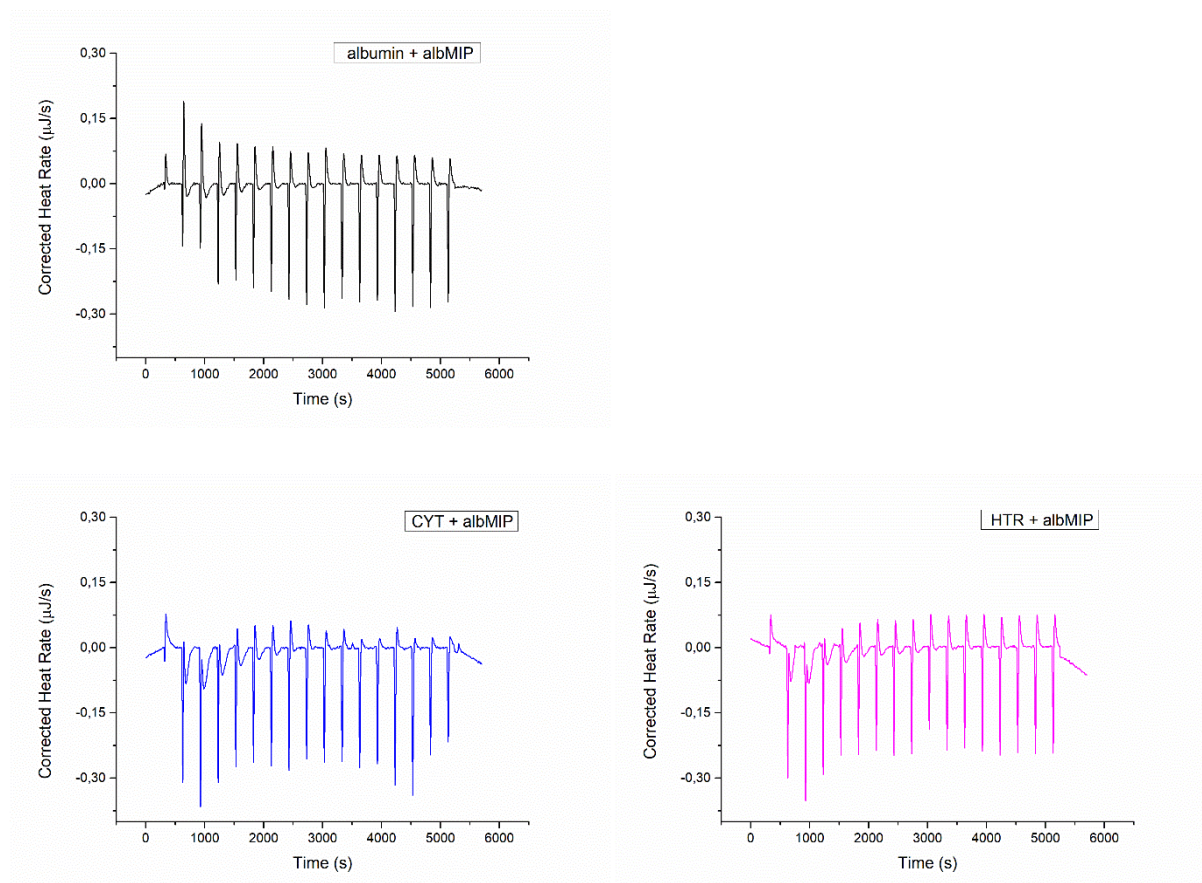

## 9. Cell toxicity

**Figure S9.1.** Cell toxicity assay. Cell death percentage of untreated cells (negative control, best viability condition) compared with percentages of cells exposed to 0.25 and 1.5 mg/mL nanoparticle suspension are statistically non-significant ( $p > 0.05$ , in the specific  $p = 0.24$  and  $p = 0.137$  respectively). Positive control represents the condition of total cell death.

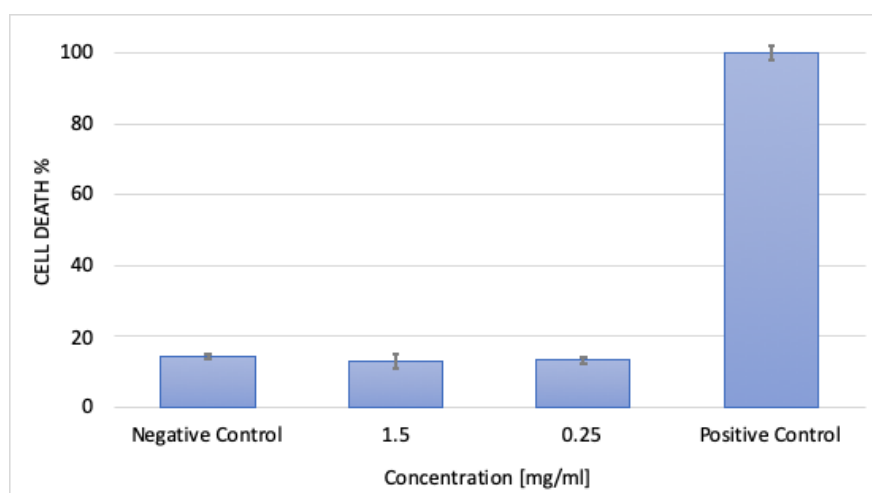

## 10. Functional silk fibers decorated with MIP SF-NPs

**Figure S10.1.** Upper panels (Rhod) report the emissions at  $\lambda_{em} = 525/50$  nm; the lower panels (fitc) report the emissions at  $\lambda_{em} = 595/50$  nm. Silk fibers (right) and electrospun silk nanofibers (left) coupled to Rhodamine non imprinted SF-NPs (Rhod NIP SF-NPs) showed red emission, confirming a uniform decoration (a-c). Rhod NIP SF-NPs challenged with fitc-alb showed weak fitc signal (b-d) addressable to non-specific albumin adsorption to fibers.

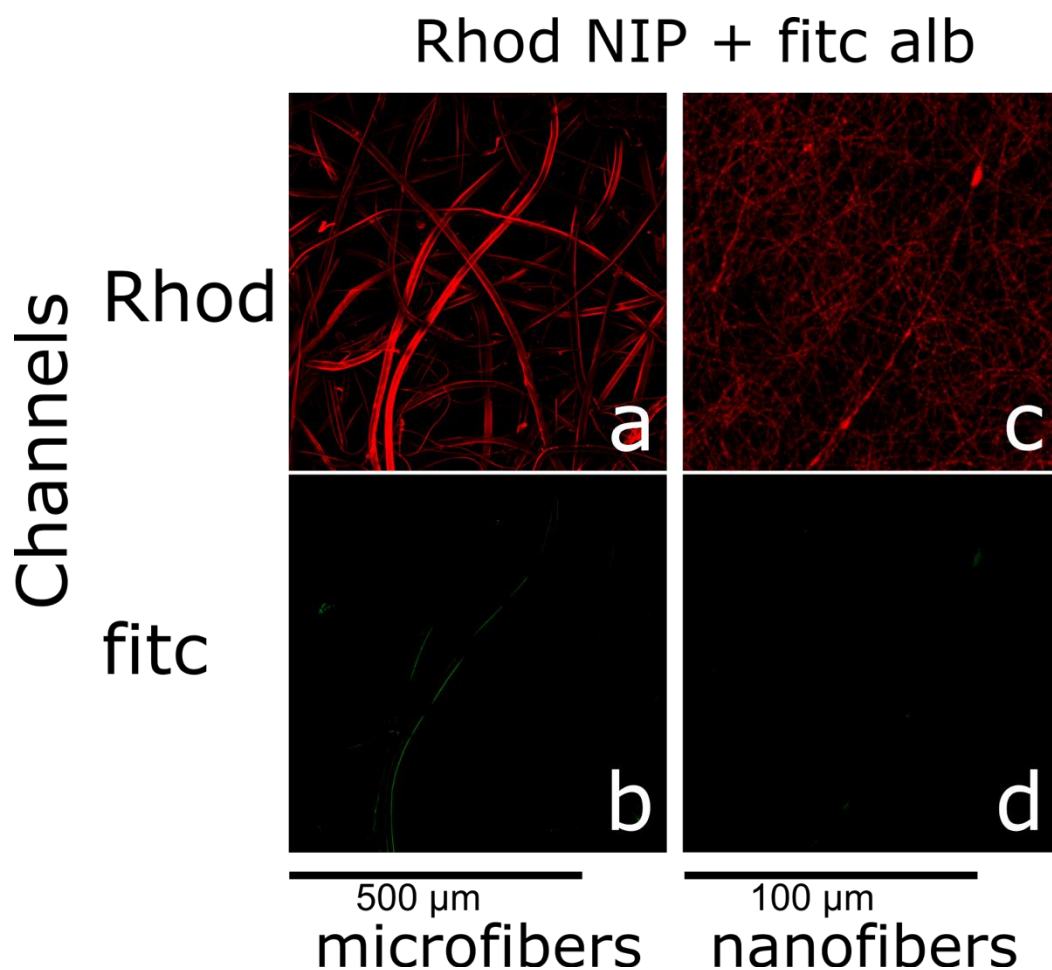

## References

1. Horan, R. L.; Antle, K.; Collette, A. L.; Wang, Y.; Huang, J.; Moreau, J. E.; Volloch, V.; Kaplan, D. L.; Altman, G. H. In Vitro Degradation of Silk Fibroin. *Biomaterials* **2005**, *26* (17), 3385–3393. <https://doi.org/10.1016/j.biomaterials.2004.09.020>.
